# Supplementary material for: Functionalization of Si(111) surfaces with alkyl chains terminated by electrochemically polymerizable thienyl units
Source: Royal Society of Chemistry journal article supplement (doi:10.1039/b208446e), 2002-01-01
Supplement: b208446e.doc [file b208446e.doc]

# Article Ref : B208446E – Chemical Communications

**Supporting Information**

*B. Fabre et al.*

**Fig. S1**: Cyclic voltammograms at 0.02 V s-1 in CH3CN + 10-1 M Bu4NClO4 corresponding to the oxidation of 5 x 10-2 M thiophene onto Si(111)-C10H20C(2-thienyl)2OH (1st scan) and the response of the corresponding electrogenerated polythiophene film (2nd scan).

**Fig. S2**: Cyclic voltammograms at 0.02 V s-1 in CH3CN + 10-1 M Bu4NClO4 of polythiophene films electrogenerated onto Si(111)-C10H20C(2-thienyl)2OH using 6.6 and 80 mC (*i.e.* 360 nm as determined by AFM).
